# Supplementary material for: Limited proteolysis of human histone deacetylase 1
Source: PubMed Central journal article supplement (PMC1613246; doi:10.1186/1471-2091-7-22), 2006-10-05
Supplement: 1471-2091-7-22-S3.pdf [file 1471-2091-7-22-S3.pdf]

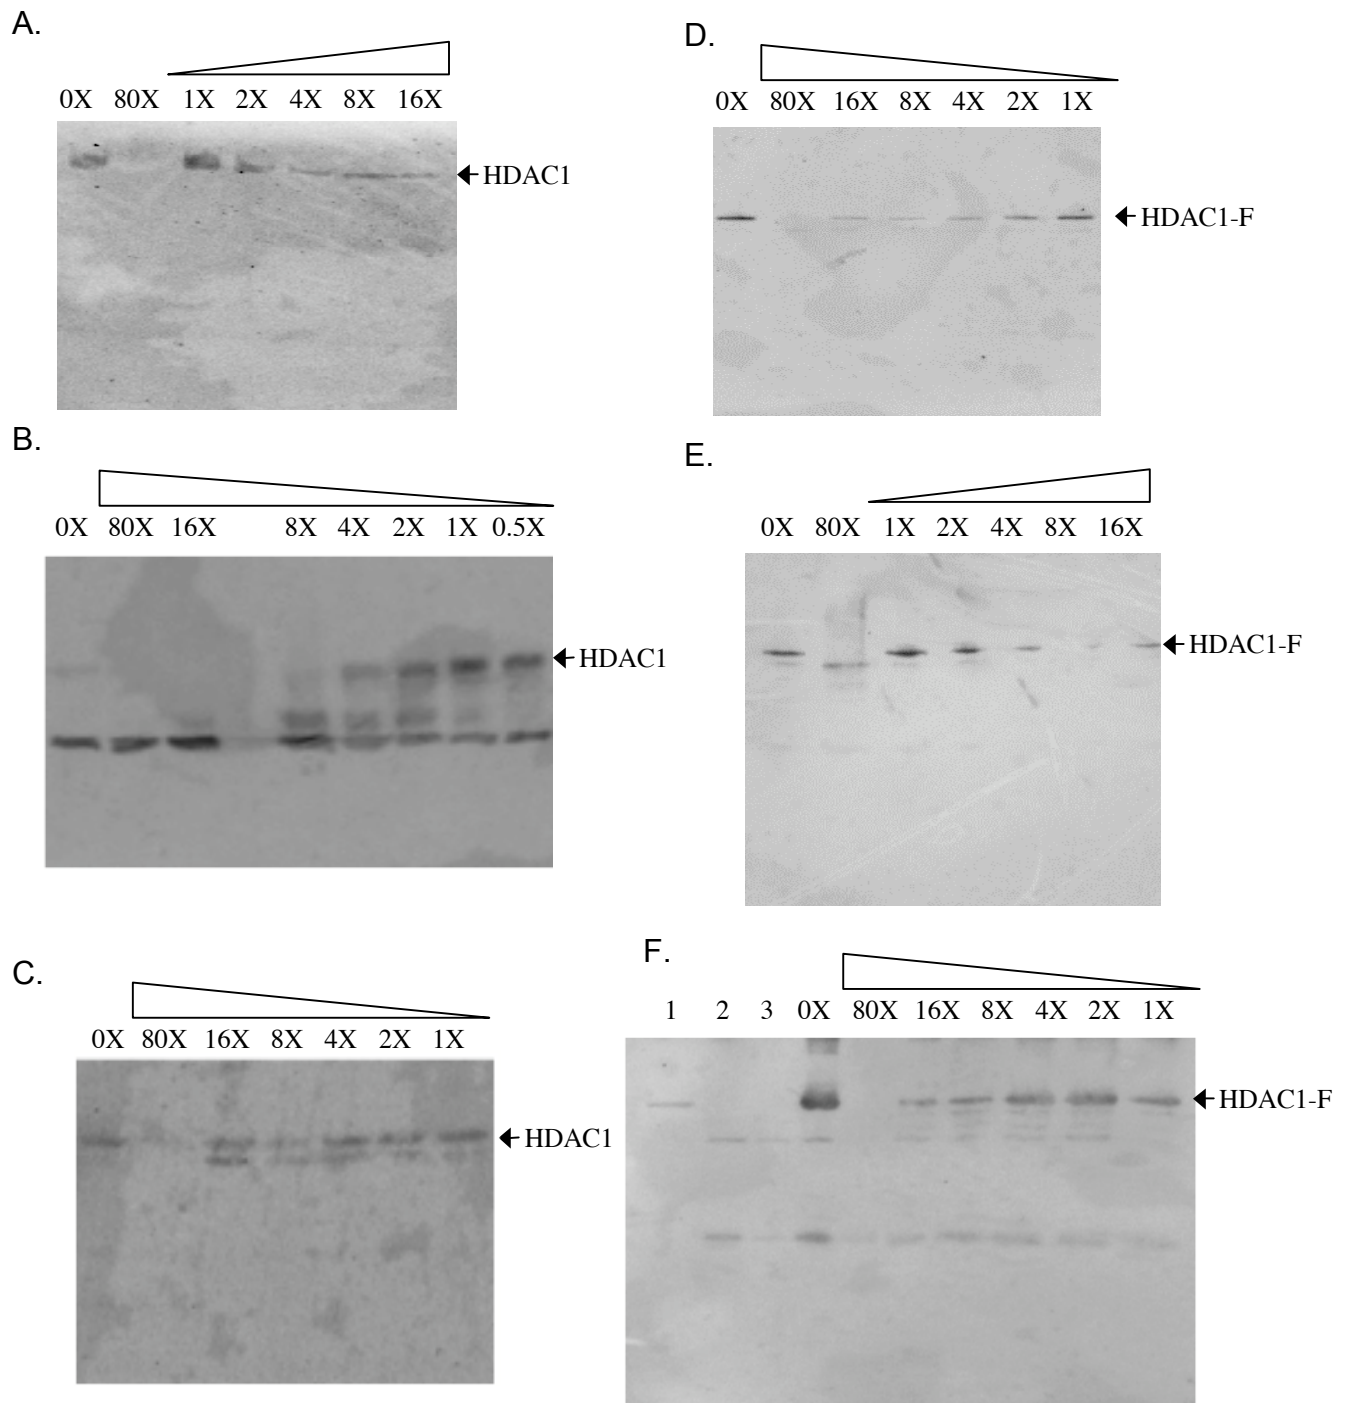

**Additional File 3- Limited proteolysis of endogenous and transiently expressed HDAC1**

Immunoprecipitated endogenous (A, B and C) and transiently expressed HDAC1-Flag (HDAC1-F) (D, E, and F) were incubated at room temperature with increasing concentrations of trypsin (see Figure 1). After separation by SDS-PAGE, the proteins were visualized with anti-HDAC1 antibody in case of endogenous HDAC1 or anti-Flag antibody in case of transiently expressed HDAC1-F. (F) Additional control lanes are shown- lane 1- TAg Jurkat cell lysates containing expressed HDAC1; lane 2- Flag-Agarose beads alone; lane 3- Flag-Agarose beads incubated with 80X trypsin.
